# Supplementary material for: Design, synthesis and biological evaluation of choline based SPECT imaging agent: Ga(iii)-DO3A-EA-Choline
Source: Royal Society of Chemistry journal article supplement (doi:10.1039/c0ob00506a), 2011-01-01

## Supporting Information

### Design, Synthesis and Biological Evaluation of Choline based SPECT Imaging Agent:

#### Ga(III)-DO3A-EA-Choline<sup>†1</sup>

Jasleen K. Uppal<sup>a,b</sup>, Puja P. Hazari<sup>a</sup>, Raunak<sup>a</sup>, Krishna Chuttani<sup>a</sup>, Michele Allard<sup>c</sup>, Narender.

K. Kaushik<sup>b</sup> and Anil K. Mishra<sup>\*a,c</sup>

#### Table of Contents:

1. <sup>1</sup>H NMR spectrum
2. <sup>13</sup>C NMR Spectrum
3. Mass Spectrum

---

<sup>a</sup>Institute of Nuclear Medicine and Allied Sciences. Brig. S. K. Mazumdar Road, Delhi-110054, India.

E-mail: akmishra@inmas.drdo.in

<sup>b</sup>Department of Chemistry, University of Delhi, Delhi. India.

<sup>c</sup>Centre de Resonance Manistique de Système Biologique UMR 5536 CNRS / Université Victor Ségalen University of Bordeaux, France.

<sup>†</sup>Electronic supplementary information (ESI) available: Supplementary figures

**Figure S1.**  $^1\text{H}$  NMR spectrum of *N,N*-dimethylaminoethylacetate, **2** [400 MHz;  $\text{CDCl}_3$ ]

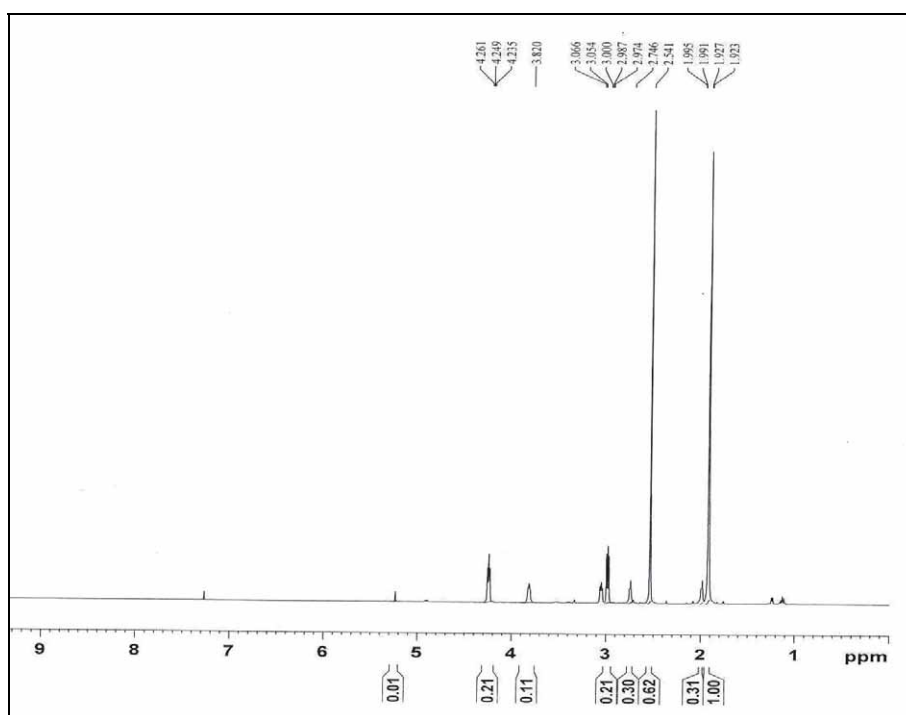

**Figure S2.**  $^{13}\text{C}$  NMR spectrum of *N,N*-dimethylaminoethylacetate, **2** [400 MHz;  $\text{CDCl}_3$ ]

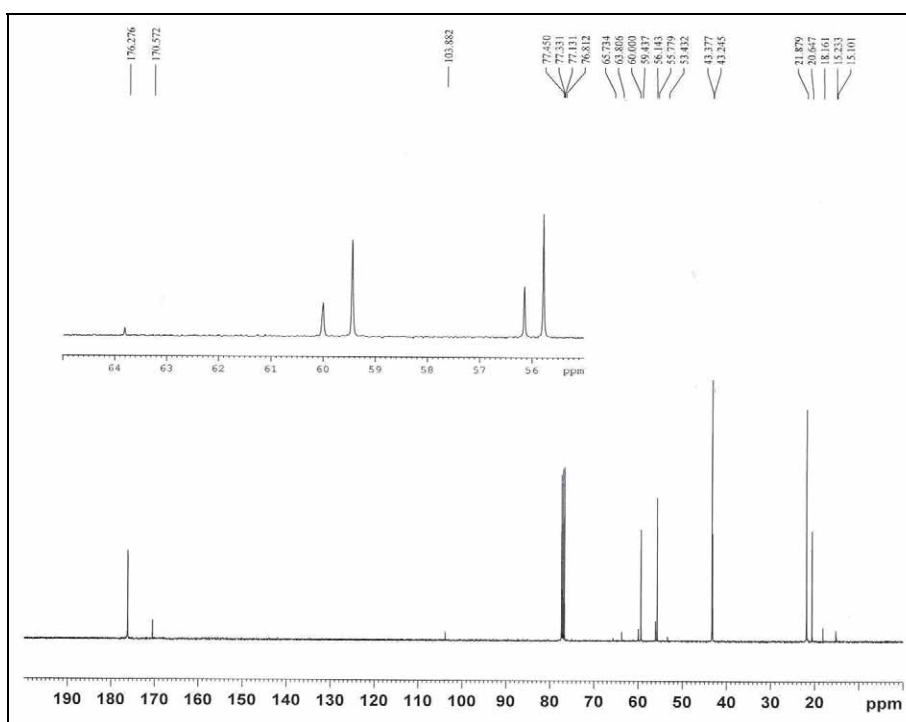

**Figure S3.** Mass spectrum of *N,N*-dimethylaminoethylacetate, **2** [ESI<sup>+</sup>]

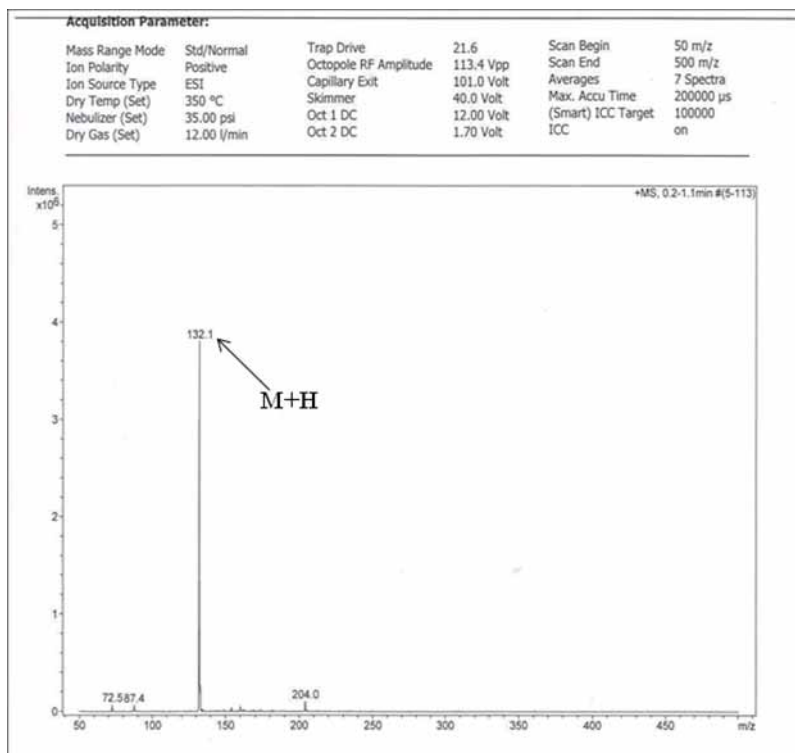

**Figure S4.** <sup>1</sup>H NMR spectrum of (2-acetoxy-ethyl)-(2-bromo-ethyl)-dimethyl-ammonium, **3** [400 MHz; CDCl<sub>3</sub>]

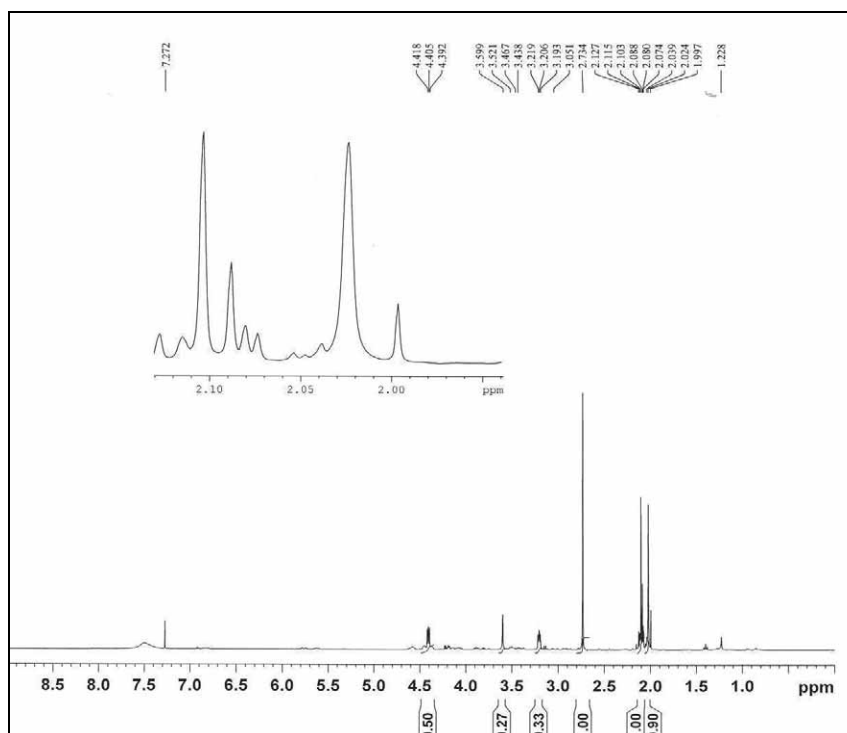

**Figure S5.**  $^{13}\text{C}$  NMR spectrum of (2-acetoxy-ethyl)-(2-bromo-ethyl)-dimethyl-ammonium, **3** [400 MHz;  $\text{CDCl}_3$ ]

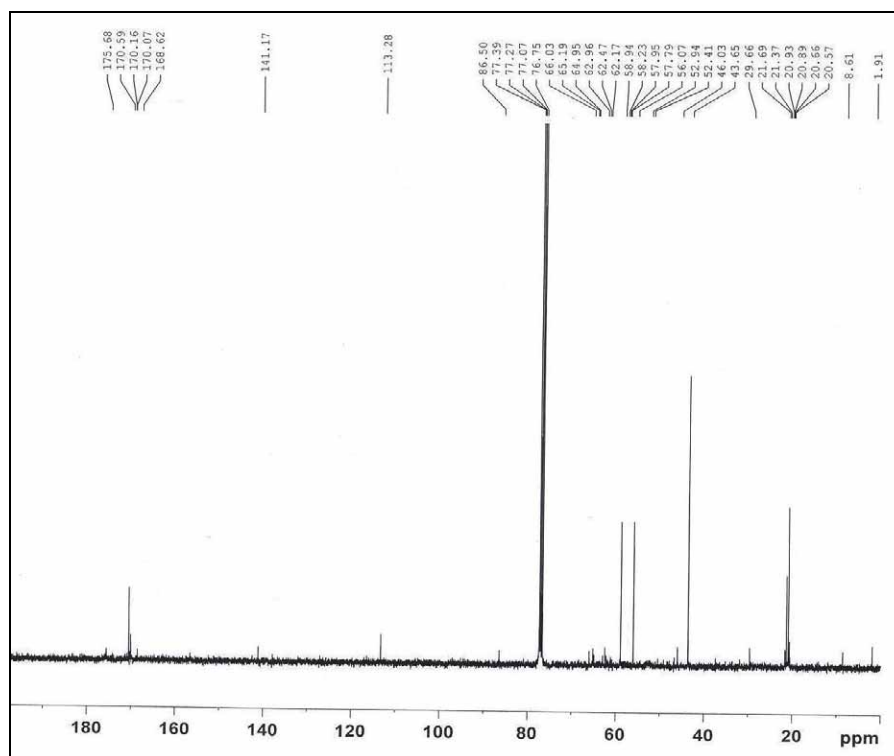

**Figure S6.** Mass spectrum of (2-acetoxy-ethyl)-(2-bromo-ethyl)-dimethyl-ammonium, **3** [ESI $^+$ ]

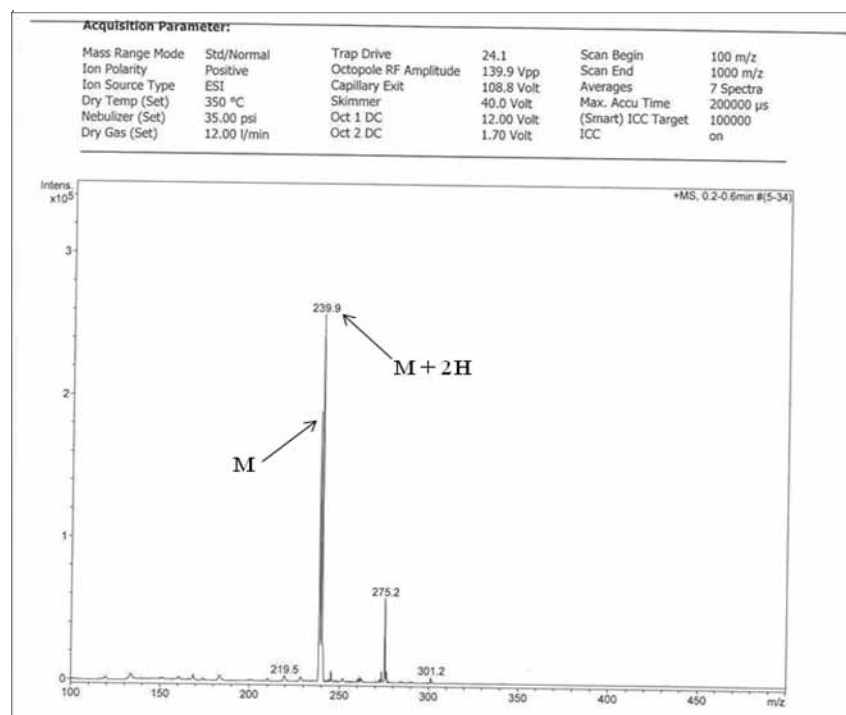

**Figure S7.** <sup>1</sup>H NMR spectrum of (4,7-bis-*t*-butoxycarbonylmethyl-1,4,7,10 tetraaza-cyclododec-1-yl)-acetic acid *t*-butyl ester, **4** [400 MHz; CDCl<sub>3</sub>]

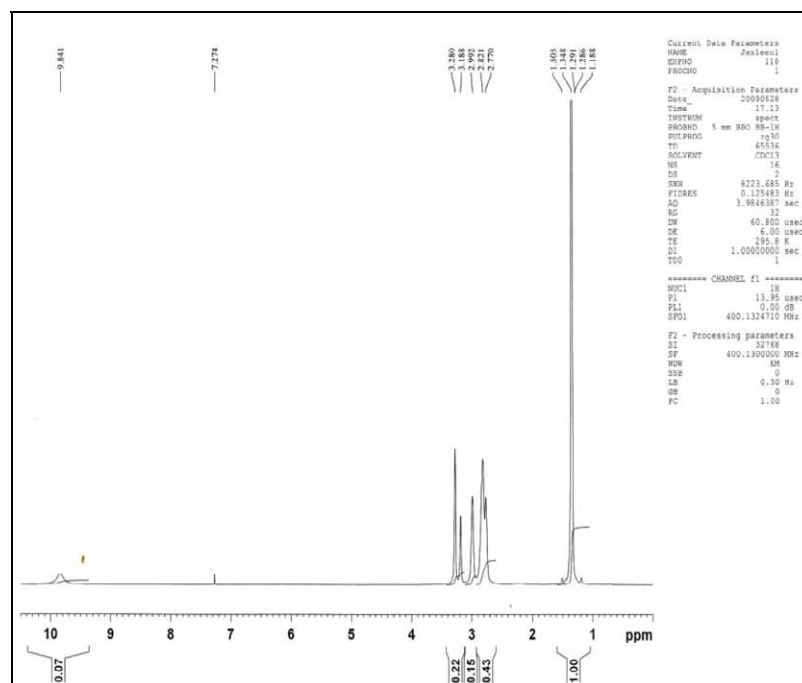

**Figure S8.** <sup>13</sup>C NMR spectrum of (4, 7-bis-*t*-butoxycarbonylmethyl-1,4,7,10 tetraaza-cyclododec-1-yl)-acetic acid *t*-butyl ester, **4** [400 MHz; CDCl<sub>3</sub>]

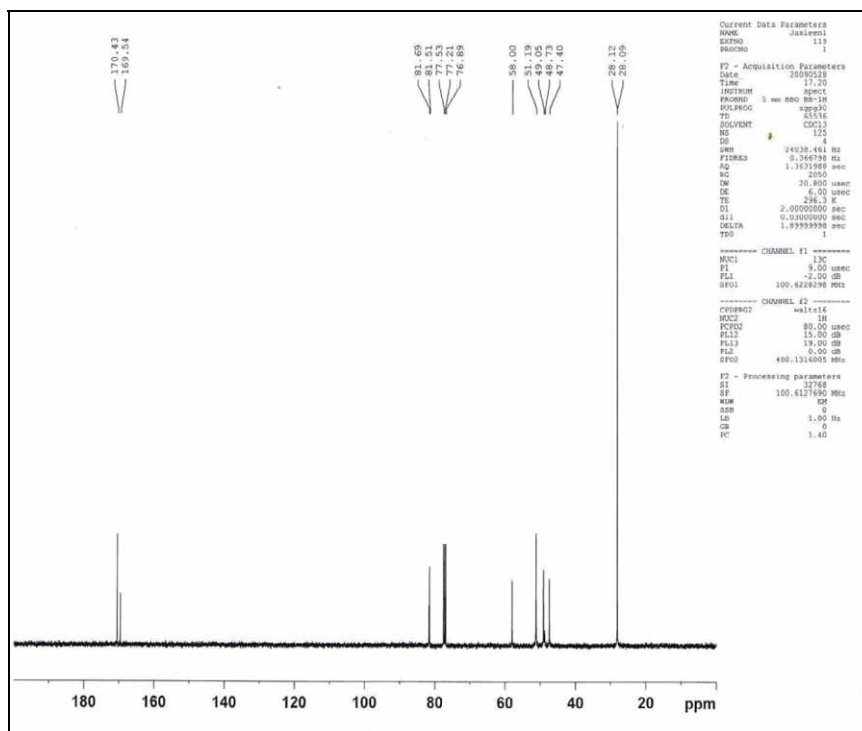

**Figure S9.** Mass spectrum of (4,7-bis-*t*-butoxycarbonylmethyl-1,4,7,10 tetraaza-cyclododec-1-yl)-acetic acid *t*-butyl ester, **4** [ESI<sup>+</sup>]

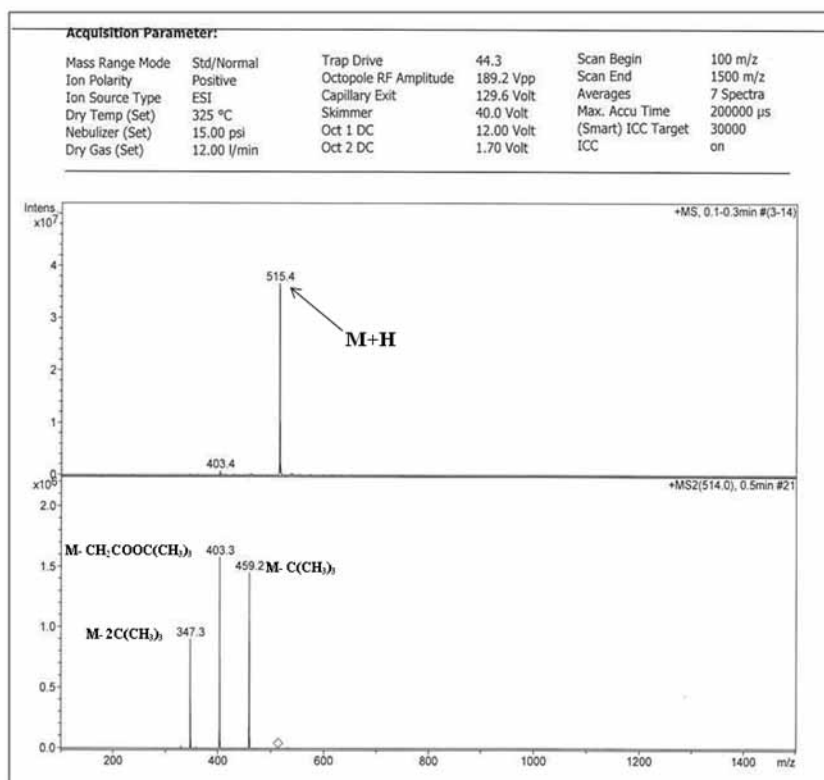

This journal is (c) The Royal Society of Chemistry 2011

**Figure S10.**  $^1\text{H}$  NMR spectrum of (2-acetoxy-ethyl)-dimethyl-[2-(4,7,10-tris-*tert*-butoxycarbonylmethyl-1,4,7,10-tetraaza-cyclododec-1-yl)-ethyl]-ammonium, **5** [400 MHz;  $\text{CDCl}_3$ ]

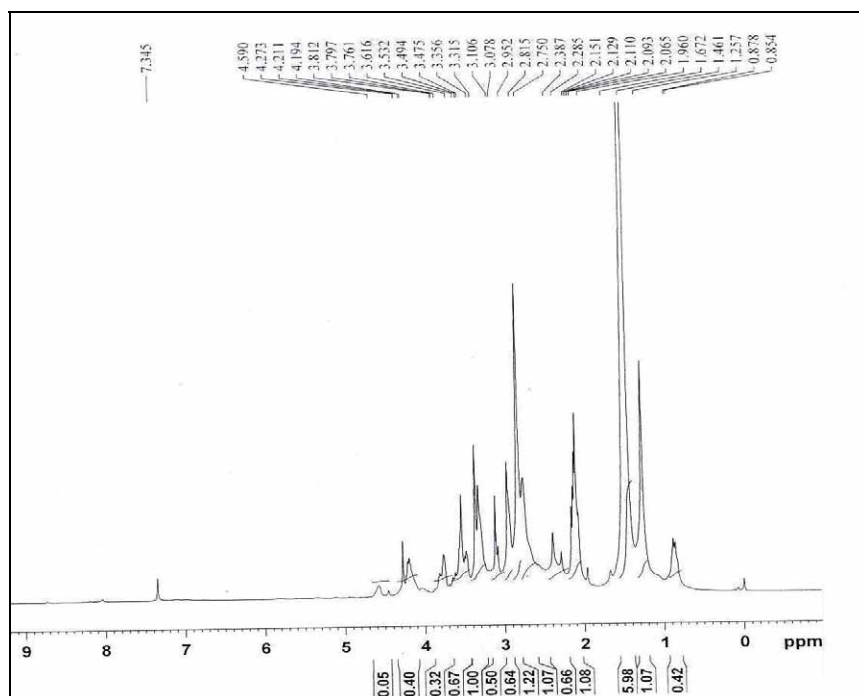

**Figure S11.**  $^{13}\text{C}$  NMR spectrum of (2-acetoxy-ethyl)-dimethyl-[2-(4,7,10-tris-*tert*-butoxycarbonylmethyl-1,4,7,10-tetraaza-cyclododec-1-yl)-ethyl]-ammonium, **5** [400 MHz;  $\text{CDCl}_3$ ]

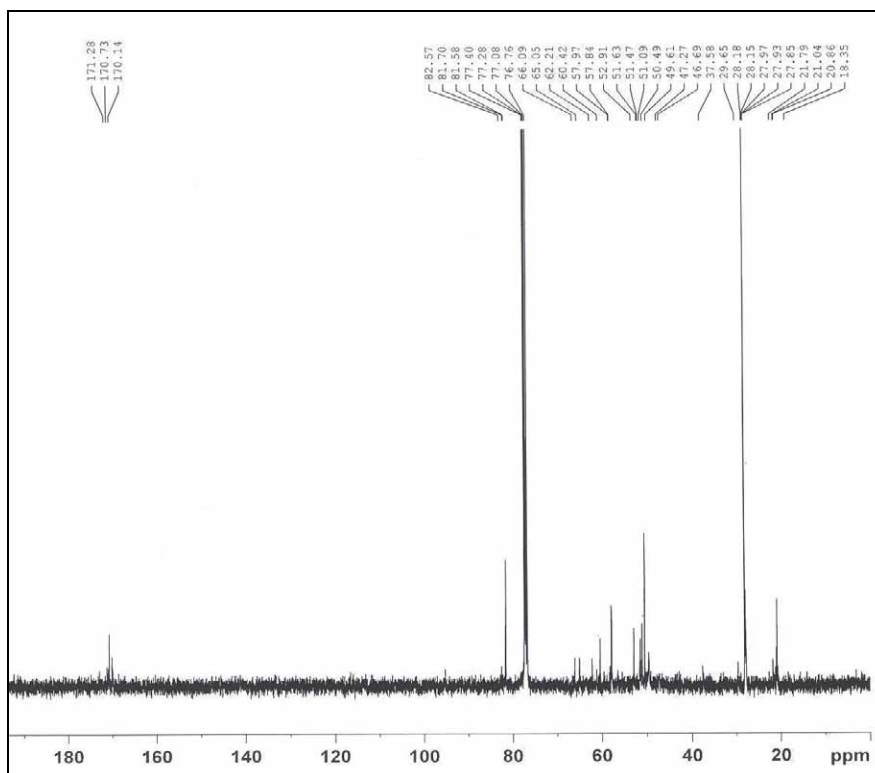

**Figure S12.** Mass spectrum of (2-acetoxy-ethyl)-dimethyl-[2-(4,7,10-tris-*tert*-butoxycarbonylmethyl-1,4,7,10-tetraaza-cyclododec-1-yl)-ethyl]-ammonium, **5** [ESI<sup>+</sup>]

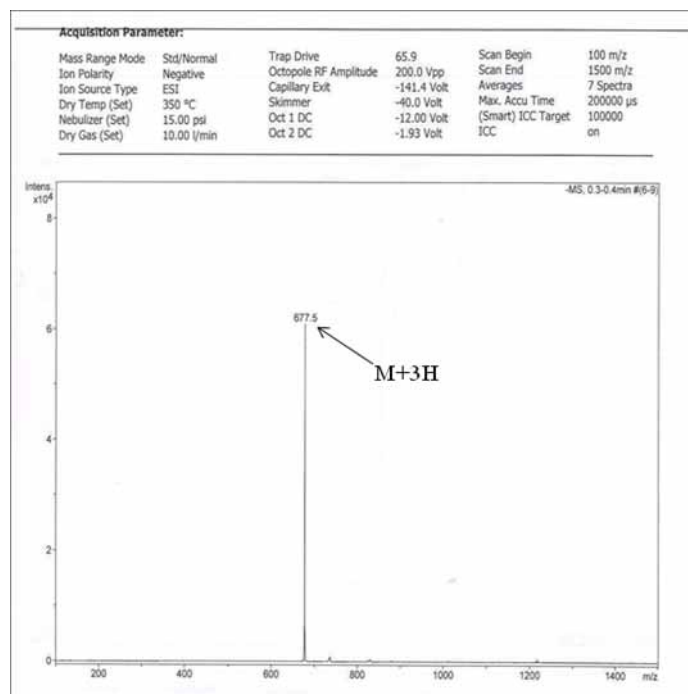

**Figure S13.** <sup>1</sup>H NMR spectrum of (2-hydroxy-ethyl)-dimethyl-[2-(4,7,10-tris-carboxymethyl-1,4,7,10-tetraaza-cyclododec-1-yl)-ethyl]-ammonium, **6** [400 MHz; D<sub>2</sub>O]

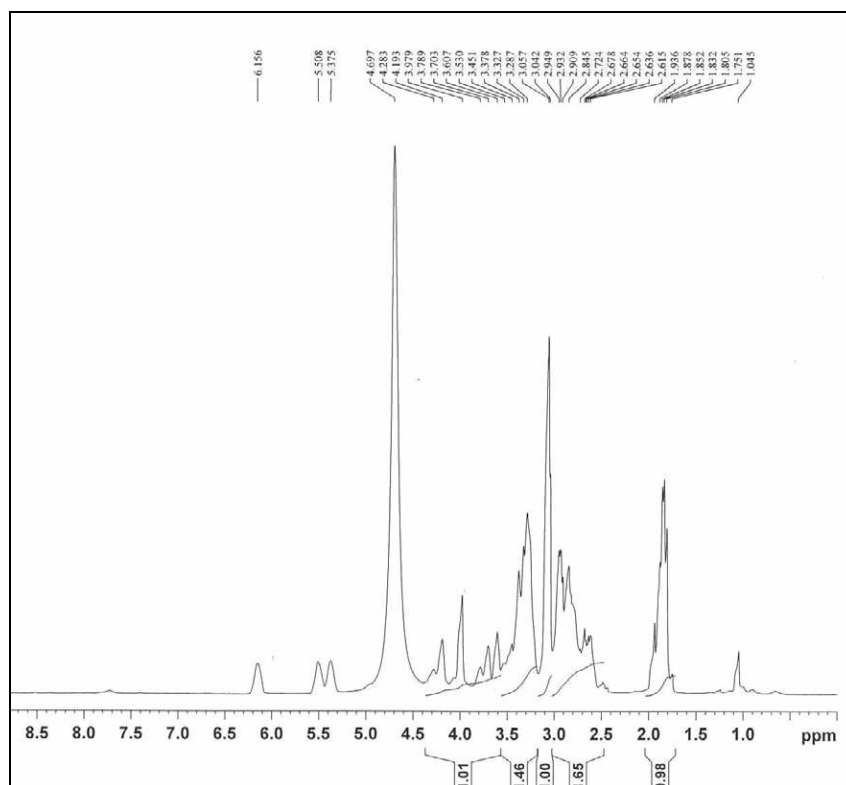



**Figure S14.**  $^{13}\text{C}$  NMR spectrum of (2-hydroxy-ethyl)-dimethyl-[2-(4,7,10-tris-carboxymethyl-1,4,7,10-tetraaza-cyclododec-1-yl)-ethyl]-ammonium, **6** [400 MHz;  $\text{D}_2\text{O}$ ]

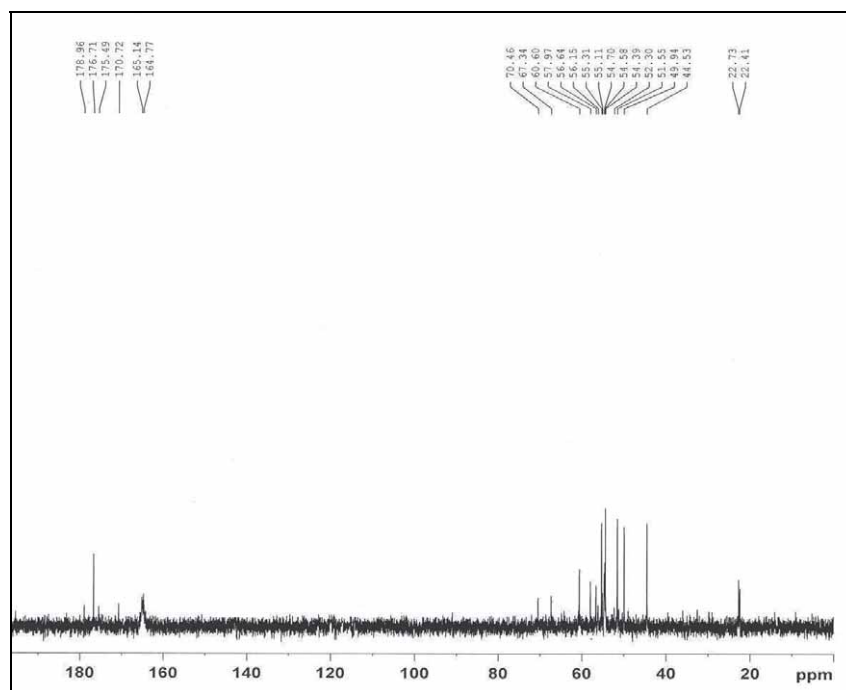

**Figure S15.** Mass spectrum of (2-hydroxy-ethyl)-dimethyl-[2-(4,7,10-tris-carboxymethyl-1,4,7,10 tetraaza-cyclododec-1-yl)-ethyl]-ammonium, **6** [ $\text{ESI}^+$ ]

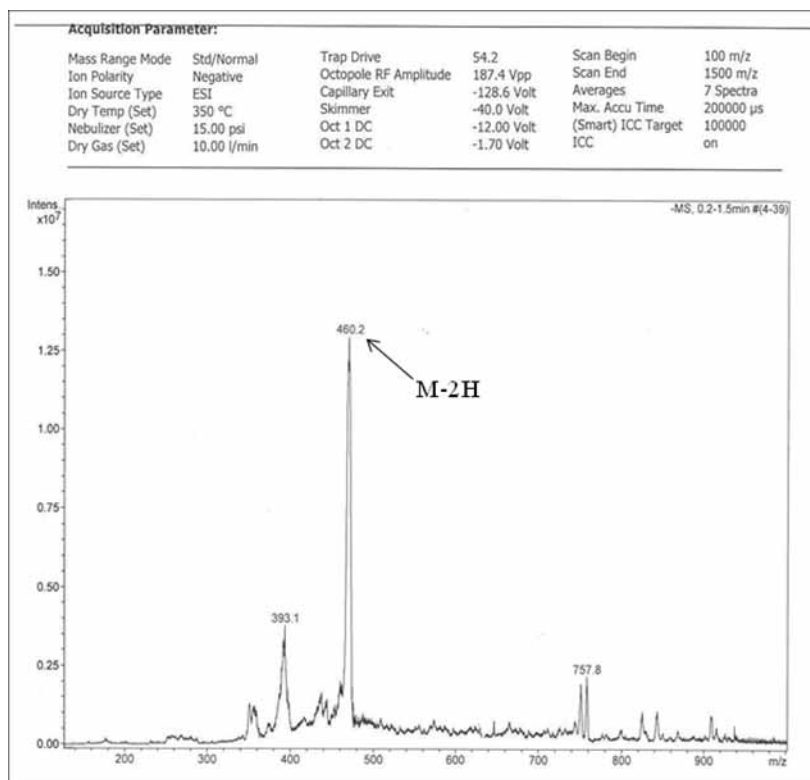

Supplement: c0ob00506a.pdf [file c0ob00506a.pdf]
